# Supplementary material
Source: MDPI journal article supplement (https://www.mdpi.com/2673-8449/2/2/10)
Supplement: s1 [file s1]

**Table S1.** Multiple comparisons among the groups at different time intervals in the hyperglycemic mice model.

| Multiple Comparisons |          |          |                       |            |       |                                        |             |
|----------------------|----------|----------|-----------------------|------------|-------|----------------------------------------|-------------|
| Tukey HSD            |          |          |                       |            |       |                                        |             |
| Dependent Variable   | (I) Time | (J) Time | Mean Difference (I-J) | Std. Error | Sig.  | 95% Confidence Interval<br>Lower Bound | Upper Bound |
| Group 2              | 0 min    | 30 min   | -6.34000*             | 0.47892    | 0.000 | -7.7731                                | -4.9069     |
|                      |          | 60 min   | -4.76000*             | 0.47892    | 0.000 | -6.1931                                | -3.3269     |
|                      |          | 90 min   | -3.36000*             | 0.47892    | 0.000 | -4.7931                                | -1.9269     |
|                      |          | 150 min  | -2.16000*             | 0.47892    | 0.002 | -3.5931                                | -0.7269     |
|                      | 30 min   | 0 min    | 6.34000*              | 0.47892    | 0.000 | 4.9069                                 | 7.7731      |
|                      |          | 60 min   | 1.58000*              | 0.47892    | 0.026 | 0.1469                                 | 3.0131      |
|                      |          | 90 min   | 2.98000*              | 0.47892    | 0.000 | 1.5469                                 | 4.4131      |
|                      |          | 150 min  | 4.18000*              | 0.47892    | 0.000 | 2.7469                                 | 5.6131      |
|                      | 60 min   | 0 min    | 4.76000*              | 0.47892    | 0.000 | 3.3269                                 | 6.1931      |
|                      |          | 30 min   | -1.58000*             | 0.47892    | 0.026 | -3.0131                                | -0.1469     |
|                      |          | 90 min   | 1.40000               | 0.47892    | 0.058 | -0.0331                                | 2.8331      |
|                      |          | 150 min  | 2.60000*              | 0.47892    | 0.000 | 1.1669                                 | 4.0331      |
|                      | 90 min   | 0 min    | 3.36000*              | 0.47892    | 0.000 | 1.9269                                 | 4.7931      |
|                      |          | 30 min   | -2.98000*             | 0.47892    | 0.000 | -4.4131                                | -1.5469     |
|                      |          | 60 min   | -1.40000              | 0.47892    | 0.058 | -2.8331                                | 0.0331      |
|                      |          | 150 min  | 1.20000               | 0.47892    | 0.129 | -0.2331                                | 2.6331      |
|                      | 150 min  | 0 min    | 2.16000*              | 0.47892    | 0.002 | 0.7269                                 | 3.5931      |
|                      |          | 30 min   | -4.18000*             | 0.47892    | 0.000 | -5.6131                                | -2.7469     |
|                      |          | 60 min   | -2.60000*             | 0.47892    | 0.000 | -4.0331                                | -1.1669     |
|                      |          | 90 min   | -1.20000              | 0.47892    | 0.129 | -2.6331                                | 0.2331      |
| Group 3              | 0 min    | 30 min   | -4.52000*             | 0.21485    | 0.000 | -5.1629                                | -3.8771     |
|                      |          | 60 min   | -3.42000*             | 0.21485    | 0.000 | -4.0629                                | -2.7771     |
|                      |          | 90 min   | -2.20000*             | 0.21485    | 0.000 | -2.8429                                | -1.5571     |
|                      |          | 150 min  | -0.20000              | 0.21485    | 0.882 | -0.8429                                | 0.4429      |
|                      | 30 min   | 0 min    | 4.52000*              | 0.21485    | 0.000 | 3.8771                                 | 5.1629      |
|                      |          | 60 min   | 1.10000*              | 0.21485    | 0.000 | 0.4571                                 | 1.7429      |
|                      |          | 90 min   | 2.32000*              | 0.21485    | 0.000 | 1.6771                                 | 2.9629      |
|                      |          | 150 min  | 4.32000*              | 0.21485    | 0.000 | 3.6771                                 | 4.9629      |
|                      | 60 min   | 0 min    | 3.42000*              | 0.21485    | 0.000 | 2.7771                                 | 4.0629      |
|                      |          | 30 min   | -1.10000*             | 0.21485    | 0.000 | -1.7429                                | -0.4571     |
|                      |          | 90 min   | 1.22000*              | 0.21485    | 0.000 | 0.5771                                 | 1.8629      |
|                      |          | 150 min  | 3.22000*              | 0.21485    | 0.000 | 2.5771                                 | 3.8629      |
|                      | 90 min   | 0 min    | 2.20000*              | 0.21485    | 0.000 | 1.5571                                 | 2.8429      |
|                      |          | 30 min   | -2.32000*             | 0.21485    | 0.000 | -2.9629                                | -1.6771     |
|                      |          | 60 min   | -1.22000*             | 0.21485    | 0.000 | -1.8629                                | -0.5771     |
|                      |          | 150 min  | 2.00000*              | 0.21485    | 0.000 | 1.3571                                 | 2.6429      |
|                      | 150 min  | 0 min    | 0.20000               | 0.21485    | 0.882 | -0.4429                                | 0.8429      |
|                      |          | 30 min   | -4.32000*             | 0.21485    | 0.000 | -4.9629                                | -3.6771     |
|                      |          | 60 min   | -3.22000*             | 0.21485    | 0.000 | -3.8629                                | -2.5771     |
|                      |          | 90 min   | -2.00000*             | 0.21485    | 0.000 | -2.6429                                | -1.3571     |
| Group 4              | 0 min    | 30 min   | -4.12000*             | 0.20298    | 0.000 | -4.7274                                | -3.5126     |
|                      |          | 60 min   | -2.90000*             | 0.20298    | 0.000 | -3.5074                                | -2.2926     |
|                      |          | 90 min   | -1.44000*             | 0.20298    | 0.000 | -2.0474                                | -0.8326     |

|         |         |         |           |         |       |         |         |
|---------|---------|---------|-----------|---------|-------|---------|---------|
| Group 5 | 30 min  | 150 min | 0.42000   | 0.20298 | 0.271 | -0.1874 | 1.0274  |
|         |         | 0 min   | 4.12000*  | 0.20298 | 0.000 | 3.5126  | 4.7274  |
|         |         | 60 min  | 1.22000*  | 0.20298 | 0.000 | 0.6126  | 1.8274  |
|         |         | 90 min  | 2.68000*  | 0.20298 | 0.000 | 2.0726  | 3.2874  |
|         | 60 min  | 150 min | 4.54000*  | 0.20298 | 0.000 | 3.9326  | 5.1474  |
|         |         | 0 min   | 2.90000*  | 0.20298 | 0.000 | 2.2926  | 3.5074  |
|         |         | 30 min  | -1.22000* | 0.20298 | 0.000 | -1.8274 | -0.6126 |
|         |         | 90 min  | 1.46000*  | 0.20298 | 0.000 | 0.8526  | 2.0674  |
|         | 90 min  | 150 min | 3.32000*  | 0.20298 | 0.000 | 2.7126  | 3.9274  |
|         |         | 0 min   | 1.44000*  | 0.20298 | 0.000 | 0.8326  | 2.0474  |
|         |         | 30 min  | -2.68000* | 0.20298 | 0.000 | -3.2874 | -2.0726 |
|         |         | 60 min  | -1.46000* | 0.20298 | 0.000 | -2.0674 | -0.8526 |
|         | 150 min | 150 min | 1.86000*  | 0.20298 | 0.000 | 1.2526  | 2.4674  |
|         |         | 0 min   | -0.42000  | 0.20298 | 0.271 | -1.0274 | 0.1874  |
|         |         | 30 min  | -4.54000* | 0.20298 | 0.000 | -5.1474 | -3.9326 |
|         |         | 60 min  | -3.32000* | 0.20298 | 0.000 | -3.9274 | -2.7126 |
|         | 0 min   | 90 min  | -1.86000* | 0.20298 | 0.000 | -2.4674 | -1.2526 |
|         |         | 30 min  | -4.18000* | 0.14615 | 0.000 | -4.6173 | -3.7427 |
|         |         | 60 min  | -3.50000* | 0.14615 | 0.000 | -3.9373 | -3.0627 |
|         |         | 90 min  | -2.66000* | 0.14615 | 0.000 | -3.0973 | -2.2227 |
|         | 30 min  | 150 min | -1.48000* | 0.14615 | 0.000 | -1.9173 | -1.0427 |
|         |         | 0 min   | 4.18000*  | 0.14615 | 0.000 | 3.7427  | 4.6173  |
|         |         | 60 min  | 0.68000*  | 0.14615 | 0.001 | 0.2427  | 1.1173  |
|         |         | 90 min  | 1.52000*  | 0.14615 | 0.000 | 1.0827  | 1.9573  |
| Group 5 | 60 min  | 150 min | 2.70000*  | 0.14615 | 0.000 | 2.2627  | 3.1373  |
|         |         | 0 min   | 3.50000*  | 0.14615 | 0.000 | 3.0627  | 3.9373  |
|         |         | 30 min  | -0.68000* | 0.14615 | 0.001 | -1.1173 | -0.2427 |
|         |         | 90 min  | 0.84000*  | 0.14615 | 0.000 | 0.4027  | 1.2773  |
|         | 90 min  | 150 min | 2.02000*  | 0.14615 | 0.000 | 1.5827  | 2.4573  |
|         |         | 0 min   | 2.66000*  | 0.14615 | 0.000 | 2.2227  | 3.0973  |
|         |         | 30 min  | -1.52000* | 0.14615 | 0.000 | -1.9573 | -1.0827 |
|         |         | 60 min  | -0.84000* | 0.14615 | 0.000 | -1.2773 | -0.4027 |
|         | 150 min | 150 min | 1.18000*  | 0.14615 | 0.000 | 0.7427  | 1.6173  |
|         |         | 0 min   | 1.48000*  | 0.14615 | 0.000 | 1.0427  | 1.9173  |
|         |         | 30 min  | -2.70000* | 0.14615 | 0.000 | -3.1373 | -2.2627 |
|         |         | 60 min  | -2.02000* | 0.14615 | 0.000 | -2.4573 | -1.5827 |
|         |         | 90 min  | -1.18000* | 0.14615 | 0.000 | -1.6173 | -0.7427 |

\* The mean difference is significant at the 0.05 level.
